# Factors associated with iron deficiency and how they can be used in blood donor selection processes

Sofie Ekroos (University of Helsinki), Mikko Arvas (Finnish Red Cross Blood Service), Johanna Castrén (Finnish Red Cross Blood Service)

## Abstract

**Background and objectives:** In an effort to improve donor health, we set out to investigate determinants other than blood donation that increase risk of ID in a healthy population and if they should be implemented into current blood donor selection processes.

**Methods:** We systematically searched the PubMed, Ovid Medline and Scopus for articles related to ID.

**Results:** Current evidence suggests that several determinants, including biological, environmental, lifestyle and socioeconomic factors increase the risk for ID.

**Conclusions:** Heavy menstruation, use of some medications and dietary factors could potentially be implemented in donor selection, however further study is needed.

## Introduction

The purpose of this systematic literature review was to investigate determinants for iron deficiency and/or iron deficiency anemia in the normal population, how they relate to blood donor selection processes and to which degree they could possibly be implemented in the donor selection process.

## Methods

Risk factors for both ID and IDA were chosen as the focus of the search. We applied an age restriction of 15-70 years and only included studies from countries with Human Development Index (HDI)  $\geq 0.800$  according to the 2020 data in order to produce a coherent data set (1).

## Systemic search

We selected three databases: PubMed, Ovid Medline and Scopus. The conducted searches and results are included in Table 1.

Table 1: Search strategy

| Database                                                                                                                               | Search                                                                                                                                                                                                                                                                                                                                                                                                                                                                                                                                                                                                                                                                                                                                                                                                                                                                                                                                                                                        | Date of search | Results |
|----------------------------------------------------------------------------------------------------------------------------------------|-----------------------------------------------------------------------------------------------------------------------------------------------------------------------------------------------------------------------------------------------------------------------------------------------------------------------------------------------------------------------------------------------------------------------------------------------------------------------------------------------------------------------------------------------------------------------------------------------------------------------------------------------------------------------------------------------------------------------------------------------------------------------------------------------------------------------------------------------------------------------------------------------------------------------------------------------------------------------------------------------|----------------|---------|
| PubMed                                                                                                                                 | "Risk Factors"[Mesh] AND ("Anemia, Iron-Deficiency"[Mesh] OR iron deficiency) NOT ("developing countries"[MeSH Terms] OR developing countries[Text Word] OR "surgery"[Subheading] OR "surgical procedures, operative"[MeSH Terms] OR "general surgery"[MeSH Terms] OR surgery[Text Word]) Filters: Humans, English, Adolescent: 13-18 years, Adult: 19+ years, from 2010 - 2020<br>("Risk Factors"[MeSH Terms] AND ("anemia, iron-deficiency"[MeSH Terms] OR ("iron"[MeSH Terms] OR "iron"[All Fields]) AND (((("deficiencies"[All Fields] OR "deficiencies"[All Fields]) OR "deficiency"[MeSH Subheading]) OR "deficiency"[All Fields]) OR "deficient"[All Fields]) OR "deficients"[All Fields]))) NOT (((("developing countries"[MeSH Terms] OR "developing countries"[Text Word]) OR "surgery"[MeSH Subheading]) OR "surgical procedures, operative"[MeSH Terms]) OR "general surgery"[MeSH Terms]) OR "surgery"[Text Word])<br>Translations<br>Iron: Iron[MeSH Terms] OR Iron[All Fields] | 11.6.2020      | 343     |
| NOTE: This preprint reports new research that has not been certified by peer review and should not be used to guide clinical practice. |                                                                                                                                                                                                                                                                                                                                                                                                                                                                                                                                                                                                                                                                                                                                                                                                                                                                                                                                                                                               |                |         |

|                     |                                                                                                                                                                                                                                                                                                                                                                                                                                                                                                                                                                                                                                                                                                                                                                                                                                                                                                                                                                                                                                                                                                                                                                                                                                                                                                                                                                                                                                                                                                                                                                                                                                                                                                                                                                                                                                                                                                                                                                                                                                                                                                                                                                                                                                                                                                                                                                                                                                                                                                                                                                                                           |           |     |
|---------------------|-----------------------------------------------------------------------------------------------------------------------------------------------------------------------------------------------------------------------------------------------------------------------------------------------------------------------------------------------------------------------------------------------------------------------------------------------------------------------------------------------------------------------------------------------------------------------------------------------------------------------------------------------------------------------------------------------------------------------------------------------------------------------------------------------------------------------------------------------------------------------------------------------------------------------------------------------------------------------------------------------------------------------------------------------------------------------------------------------------------------------------------------------------------------------------------------------------------------------------------------------------------------------------------------------------------------------------------------------------------------------------------------------------------------------------------------------------------------------------------------------------------------------------------------------------------------------------------------------------------------------------------------------------------------------------------------------------------------------------------------------------------------------------------------------------------------------------------------------------------------------------------------------------------------------------------------------------------------------------------------------------------------------------------------------------------------------------------------------------------------------------------------------------------------------------------------------------------------------------------------------------------------------------------------------------------------------------------------------------------------------------------------------------------------------------------------------------------------------------------------------------------------------------------------------------------------------------------------------------------|-----------|-----|
|                     | deficiency: "deficiencies"[All Fields] OR "deficiencies"[All Fields] OR "deficiency"[Subheading] OR "deficiency"[All Fields] OR "deficient"[All Fields] OR "deficients"[All Fields]                                                                                                                                                                                                                                                                                                                                                                                                                                                                                                                                                                                                                                                                                                                                                                                                                                                                                                                                                                                                                                                                                                                                                                                                                                                                                                                                                                                                                                                                                                                                                                                                                                                                                                                                                                                                                                                                                                                                                                                                                                                                                                                                                                                                                                                                                                                                                                                                                       |           |     |
| <b>Ovid Medline</b> | exp Anemia, Iron-Deficiency/ep and exp Anemia, Iron-Deficiency/et [Epidemiology, Etiology], time filter for 2010-2020 added                                                                                                                                                                                                                                                                                                                                                                                                                                                                                                                                                                                                                                                                                                                                                                                                                                                                                                                                                                                                                                                                                                                                                                                                                                                                                                                                                                                                                                                                                                                                                                                                                                                                                                                                                                                                                                                                                                                                                                                                                                                                                                                                                                                                                                                                                                                                                                                                                                                                               | 11.6.2020 | 202 |
| <b>Scopus</b>       | ( TITLE-ABS-KEY ( "iron deficien*" OR "sideropeni*" OR "iron suffic*" ) ) AND ( TITLE-ABS-KEY ( "risk factor*" ) ) AND NOT ( TITLE-ABS-KEY ( "surgery" OR "surgical" OR "operative" ) ) AND NOT ( TITLE-ABS-KEY ( "developing count*" OR "parasit*" ) ) AND NOT ( TITLE-ABS-KEY ( "pregnant" OR "pregnancy" OR "infant" OR "childhood anemia" OR "maternal anemia" OR "breast-feeding" OR "geriatric" ) ) AND NOT ( TITLE-ABS-KEY ( "disease association" OR "cancer" OR "kidney trans*" OR "crohn*" OR "heart failure" OR "biopsy" OR "kidney disease" OR "heart disease" OR "cardiovascular disease" OR "mortality" OR "helicobact*" OR "celiac" OR "Kawasaki" ) ) AND ( LIMIT-TO ( LANGUAGE , "English" ) ) AND ( LIMIT-TO ( PUBYEAR , 2020 ) OR LIMIT-TO ( PUBYEAR , 2019 ) OR LIMIT-TO ( PUBYEAR , 2018 ) OR LIMIT-TO ( PUBYEAR , 2017 ) OR LIMIT-TO ( PUBYEAR , 2016 ) OR LIMIT-TO ( PUBYEAR , 2015 ) OR LIMIT-TO ( PUBYEAR , 2014 ) OR LIMIT-TO ( PUBYEAR , 2013 ) OR LIMIT-TO ( PUBYEAR , 2012 ) OR LIMIT-TO ( PUBYEAR , 2011 ) OR LIMIT-TO ( PUBYEAR , 2010 ) ) AND ( LIMIT-TO ( EXACTKEYWORD , "Iron Deficiency Anemia" ) OR LIMIT-TO ( EXACTKEYWORD , "Iron Deficiency" ) ) AND ( EXCLUDE ( AFFILCOUNTRY , "India" ) OR EXCLUDE ( AFFILCOUNTRY , "China" ) OR EXCLUDE ( AFFILCOUNTRY , "Iran" ) OR EXCLUDE ( AFFILCOUNTRY , "South Africa" ) OR EXCLUDE ( AFFILCOUNTRY , "Brazil" ) OR EXCLUDE ( AFFILCOUNTRY , "Indonesia" ) OR EXCLUDE ( AFFILCOUNTRY , "Nigeria" ) OR EXCLUDE ( AFFILCOUNTRY , "Mexico" ) OR EXCLUDE ( AFFILCOUNTRY , "Pakistan" ) OR EXCLUDE ( AFFILCOUNTRY , "Palestine" ) OR EXCLUDE ( AFFILCOUNTRY , "Thailand" ) OR EXCLUDE ( AFFILCOUNTRY , "Ghana" ) OR EXCLUDE ( AFFILCOUNTRY , "Kenya" ) OR EXCLUDE ( AFFILCOUNTRY , "Viet Nam" ) OR EXCLUDE ( AFFILCOUNTRY , "Burkina Faso" ) OR EXCLUDE ( AFFILCOUNTRY , "Cambodia" ) OR EXCLUDE ( AFFILCOUNTRY , "Egypt" ) OR EXCLUDE ( AFFILCOUNTRY , "Ethiopia" ) OR EXCLUDE ( AFFILCOUNTRY , "Iraq" ) OR EXCLUDE ( AFFILCOUNTRY , "Jordan" ) OR EXCLUDE ( AFFILCOUNTRY , "Malaysia" ) OR EXCLUDE ( AFFILCOUNTRY , "Morocco" ) OR EXCLUDE ( AFFILCOUNTRY , "Myanmar" ) OR EXCLUDE ( AFFILCOUNTRY , "Nepal" ) OR EXCLUDE ( AFFILCOUNTRY , "Niger" ) OR EXCLUDE ( AFFILCOUNTRY , "Senegal" ) OR EXCLUDE ( AFFILCOUNTRY , "Serbia" ) OR EXCLUDE ( AFFILCOUNTRY , "Sri Lanka" ) OR EXCLUDE ( AFFILCOUNTRY , "Tanzania" ) OR EXCLUDE ( AFFILCOUNTRY , "Zambia" ) ) AND ( EXCLUDE ( DOCTYPE , "le" ) OR EXCLUDE ( DOCTYPE , "ed" ) OR EXCLUDE ( DOCTYPE , "no" ) OR EXCLUDE ( DOCTYPE , "ch" ) ) AND ( EXCLUDE ( DOCTYPE , "re" ) ) | 10.6.2020 | 134 |

### Inclusion and exclusion criteria

As we were interested in current data from the past ten years, we decided to limit the search to articles published in English between the years 2010-2020. Some studies included participants younger than 15 years old, in these cases only data on the over 15-year-olds was considered. In order to produce a coherent data set we only included studies from countries with Human Development Index (HDI)  $\geq 0.800$  according to 2020 data (1).

We excluded articles that studied ID/IDA risk in patient populations with conditions that are considered impediments for blood donation, pregnancy, childbirth, surgical procedures and unlikely causes for ID/IDA in the European population (e.g. parasites). As we were interested in risk factors

in a population of potential blood donors other than blood donation itself, we excluded studies concerning the effect of blood donation. We also excluded studies on genetic variants, as using them in blood donor selection processes currently is cumbersome.

Some articles study the etiology of other conditions, from these we derived rates of ID/IDA.

The search produced 679 abstracts in total. After screening based on the article title and abstract, articles were excluded as seen in Figure 1 and duplicates were removed. Full-text articles were then accessed and assessed for eligibility and articles were excluded as seen in Figure 1. The remaining 25 articles were included in analysis.

Iron deficiency was defined as serum ferritin  $\leq 15$   $\mu\text{g/l}$  and iron deficiency anemia per the WHO definition of anemia of which most is caused by iron deficiency as hemoglobin  $\leq 12$  g/dl in women and  $\leq 13$  g/dl in men or appropriate ICD-9/ICD-10 codes (2).

Figure 1:

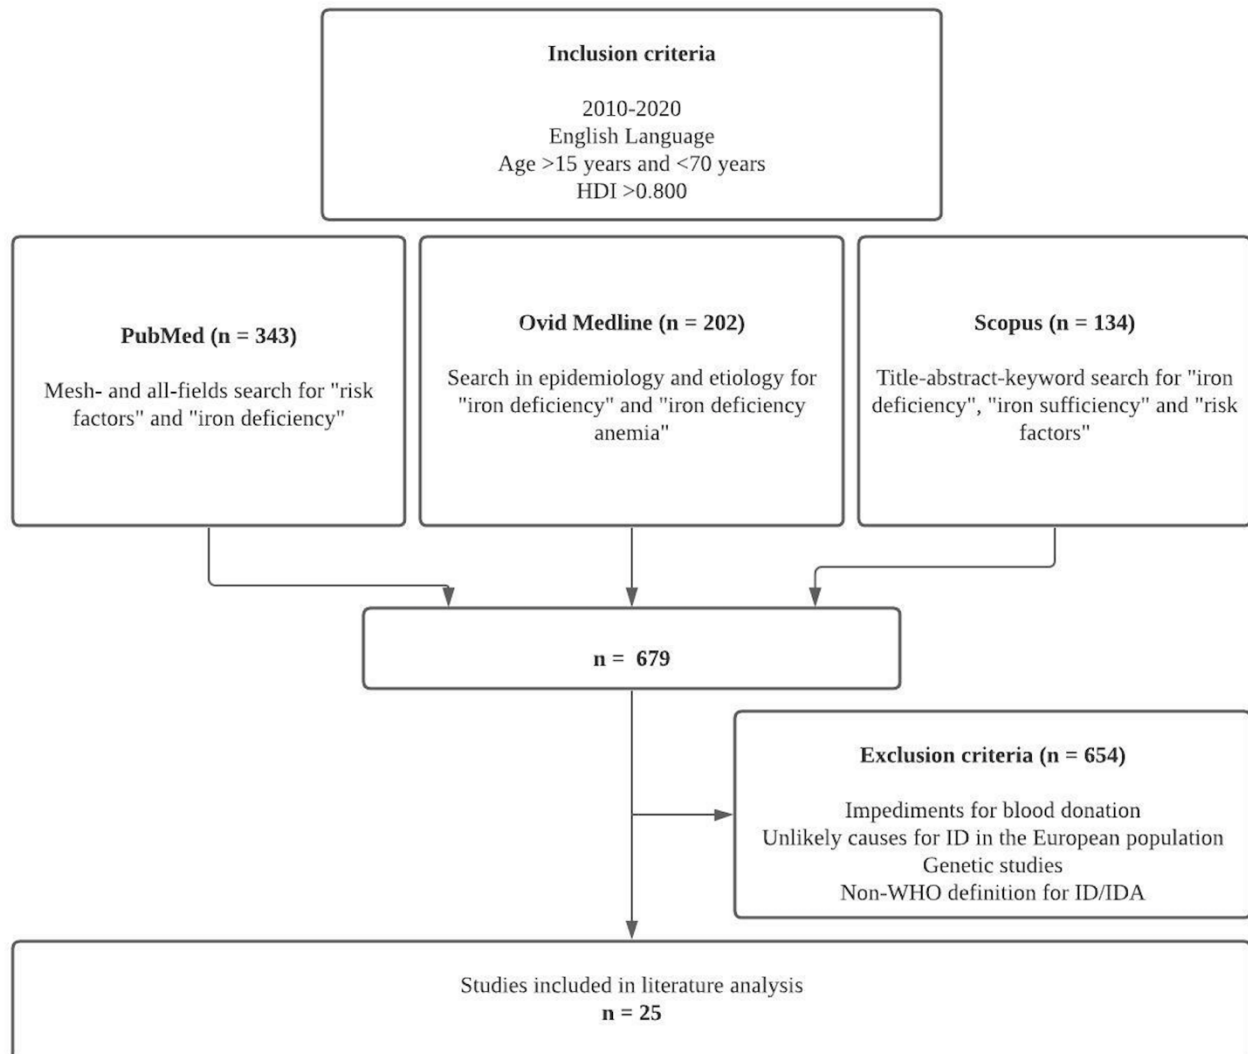

## Results

A summary of the articles found in the literature search can be found in table 2. Studied variables that were not found to increase or decrease the risk of ID/IDA, or showed statistical difference but not in a statistically significant way are displayed in the “other factors studied” column. The column

also includes variables that were investigated by the authors of the study, but we had excluded from our search.

Table 2: Study characteristics

| Citation                       | Title                                                                                                                                                              | Country      | Study design                                                                                                                 | Sample size (n=) | Sample age (years) | Sample sex | ID prevalence, %                                                                                              | IDA/anaemia prevalence, %                                                                                    | Definition of ID used                                                                         | Definition of IDA or anaemia used                                                           | Factors identified as significant risk factors (OR), (RR), (HR)                                                                                                | Factors identified as significant risk decreasing factors (OR), (RR)                                                                                                       | Other factors studied                                                                                                                                                                                                                                                                                         |
|--------------------------------|--------------------------------------------------------------------------------------------------------------------------------------------------------------------|--------------|------------------------------------------------------------------------------------------------------------------------------|------------------|--------------------|------------|---------------------------------------------------------------------------------------------------------------|--------------------------------------------------------------------------------------------------------------|-----------------------------------------------------------------------------------------------|---------------------------------------------------------------------------------------------|----------------------------------------------------------------------------------------------------------------------------------------------------------------|----------------------------------------------------------------------------------------------------------------------------------------------------------------------------|---------------------------------------------------------------------------------------------------------------------------------------------------------------------------------------------------------------------------------------------------------------------------------------------------------------|
| Gallego-Narbon et al. 2019(11) | Physiological and Dietary Determinants of Iron Status in Spanish Vegetarians                                                                                       | Spain        | Cross-sectional study utilizing 160-item food frequency, health, and psychological questionnaires and non-biomarkers         | 105              | 19-n/a             | MF         | 27.9 (deficient)<br>30.8 (deficient)                                                                          | 4.8                                                                                                          | SF <15 µg/l (from depletion), SF ≥15 to <50 µg/l (iron deficiency) and Hb <12 g/dL            | Hb <13 g/dL for males or <12 g/dL for females                                               | Female sex*<br>Duration of menstruation*                                                                                                                       | n/a                                                                                                                                                                        | Type of vegetarian diet (facto-ovo vegetarian or vegan)<br>Time being a vegetarian<br>Physical activity                                                                                                                                                                                                       |
| Chang et al. 2014(10)          | Interactive effects of dietary fat:carbohydrate ratio and body mass index on iron deficiency anemia among Taiwanese women                                          | Taiwan       | Cross-sectional study utilizing 24-h dietary recall and iron biomarkers                                                      | 3274             | 19-n/a (±19)       | F          | 8.6                                                                                                           | 6.2                                                                                                          | ≥2 abnormal indicators of iron status abnormal: SF <12 µg/l, ferritin <15 µg, and Hb <12 g/dL | Hb <12 g/dL                                                                                 | Consumption of higher dietary fat but lower carbohydrate in overweight and obese women (10.1)                                                                  | BMI in the overweight (0.37) and obese (0.48) categories<br>Other age                                                                                                      | Total caloric and iron intake<br>Type of iron consumed (heme and non-heme iron)<br>Consumption of protein and oils<br>Consumption of higher dietary fat but lower carbohydrate in women with normal weight                                                                                                    |
| Cepeda-Lopez et al. 2015(6)    | In overweight and obese women, dietary iron absorption is reduced and the enhancement of iron absorption by ascorbic acid is one-half that in normal-weight women. | Switzerland  | Randomized controlled trial comparing iron absorption and body composition                                                   | 64               | 19-45              | F          | n/a                                                                                                           | 6.45                                                                                                         | SF <15 µg/l or TfR >8.5 mg/L                                                                  | SF <15 µg/l or TfR >8.5 mg/L and Hb <12 g/dL                                                | n/a                                                                                                                                                            | n/a                                                                                                                                                                        | BMI in overweight/obese category                                                                                                                                                                                                                                                                              |
| Blanco-Rojo et al. 2014(8)     | Influence of diet, menstruation, and genetic factors on iron status: A cross-sectional study in Spanish women of childbearing age                                  | Spain        | Cross-sectional cluster analysis utilizing a 72-h detailed dietary report, a menstrual blood loss diary, and iron biomarkers | 142              | 18-35              | F          | 18.5 (poor iron status close to developing IDA)<br>41.5 (mild ID)                                             | n/a                                                                                                          | 10.72 ± 4.10 (poor iron status close to developing IDA)<br>13.99 ± 6.66 (mild ID)             | 10.45 ± 0.79 g/dL (poor iron status close to developing IDA)<br>13.06 ± 0.76 g/dL (mild ID) | High menstrual blood loss co-efficient                                                                                                                         | High red meat consumption<br>C282Y mutation of HFE                                                                                                                         | Intake of energy and nutrients (proteins, carbohydrates, lipids and total iron)<br>Consumption of other food groups (cereals, legumes, vegetables, fruits, dairy products, fish, eggs, white meat, and processed meat)<br>Other SNPs (rs3811647 and rs179852 in the T1 gene, rs13775515 in the CACNA2D3 gene) |
| Beck et al. 2014(7)            | Blood donation, being Asian, and a history of iron deficiency are stronger predictors of iron deficiency than dietary patterns in premenopausal women              | New Zealand  | Cross-sectional analysis utilizing a 144-item iron food frequency questionnaire and laboratory measurements                  | 375              | 18-44              | F          | 18.7                                                                                                          | 5.33                                                                                                         | SF <20 µg/l                                                                                   | SF <20 µg/L and Hb <120 g/L                                                                 | "Asian" ethnicity (4.84)<br>Previous iron deficiency (2.19)<br>Following a "milk and yogurt" dietary pattern (1.44)<br>"Blood donation in the past year (8.00) | Following a "meat and vegetable" dietary pattern in women who have children (0.21)                                                                                         | Age<br>BMI<br>"European" or "other" ethnicity<br>Being born in New Zealand<br>Having nosebleeds<br>Estimated menstrual blood loss<br>Use of OC or an IUD<br>Use of low dose iron supplement<br>Use of multivitamins in the past year<br>Smoking                                                               |
| Beck et al. 2013(8)            | Suboptimal iron status and associated dietary patterns and practices in premenopausal women living in Auckland, New Zealand                                        | New Zealand  | Cross-sectional analysis utilizing a 144-item iron food frequency questionnaire and laboratory measurements                  | 375              | 18-44              | F          | 18.7                                                                                                          | 5.33                                                                                                         | SF <20 µg/l                                                                                   | Hb ≤120 g/L                                                                                 | Following a "milk and yogurt" dietary pattern (1.50)<br>Other age (1.03)<br>"Asian" ethnicity (2.86)<br>"Blood donation in the past year (8.00)                | Following a "meat and vegetable" dietary pattern (0.59)<br>Following a "milk and yogurt" dietary pattern (1.44)<br>Following a "meat and vegetable" dietary pattern (0.21) | Five other dietary patterns ("refined carbohydrate and fat", "Asian", "healthy snacks", "high tea and coffee", and "bread and butter")<br>BMI<br>"European" and "Asian" ethnicity<br>Other dietary practices                                                                                                  |
| Alsaifadi et al. 2018(5)       | Risk factors of primary and secondary restless legs syndrome among a middle-aged population in Saudi Arabia: A community-based study                               | Saudi Arabia | Cross-sectional survey on the prevalence of RLS utilizing questionnaire, lower limb examination, and laboratory measurements | 78               | n/a                | MF         | 93.0                                                                                                          | 57.0                                                                                                         | SF <50 µg/l                                                                                   | SF <20 ng/ml and Hb <12 g/dL                                                                | Restless legs syndrome*                                                                                                                                        | n/a                                                                                                                                                                        | n/a                                                                                                                                                                                                                                                                                                           |
| Alizqam et al. 2018(4)         | Treatment Modalities in Adolescents Who Present with Heavy Menstrual Bleeding                                                                                      | USA          | Retrospective chart review                                                                                                   | 73               | 10-18              | F          | n/a                                                                                                           | 46.6                                                                                                         | n/a                                                                                           | Hb <12 g/dL and "low MCV" (low iron ferritin and iron level)                                | Heavy menstrual bleeding*                                                                                                                                      | Bleeding disorders                                                                                                                                                         |                                                                                                                                                                                                                                                                                                               |
| Al Zenki et al. 2015(3)        | Prevalence and Determinants of Anemia and Iron Deficiency in Kuwait                                                                                                | Kuwait       | Cross-sectional household-based cluster survey of a representative sample of Kuwaiti nationals                               | 1830             | 0-86               | MF         | 4.2 (M, 15-19y)<br>3.9 (M, 20-49y)<br>4.1 (M, ≥50y)<br>22.6 (F, 15-19y)<br>18.8 (F, 20-49y)<br>15.1 (F, ≥50y) | 2.4 (M, 15-19y)<br>2.5 (M, 20-49y)<br>5.5 (M, ≥50y)<br>7.1 (F, 15-19y)<br>17.1 (F, 20-49y)<br>18.0 (F, ≥50y) | SF <15 µg/l                                                                                   | Hb <120 g/L (females) and <130 g/L (males)                                                  | Age*<br>Female sex*                                                                                                                                            | n/a                                                                                                                                                                        | SES (education, income, marital status)                                                                                                                                                                                                                                                                       |

|                                   |                                                                                                                             |                                          |                                                                                                                                                         |          |                      |     |                                                                                                     |                                                                                                                                                                                                                                                          |             |                                                                                                                                                                                                                                                                                                                                                                                                                                                                                                                                   |                                                                                                                                                                                                                                                                                                                                                                                                                                                    |                                   |                                                                                                                                                                                                                                                                                                 |     |
|-----------------------------------|-----------------------------------------------------------------------------------------------------------------------------|------------------------------------------|---------------------------------------------------------------------------------------------------------------------------------------------------------|----------|----------------------|-----|-----------------------------------------------------------------------------------------------------|----------------------------------------------------------------------------------------------------------------------------------------------------------------------------------------------------------------------------------------------------------|-------------|-----------------------------------------------------------------------------------------------------------------------------------------------------------------------------------------------------------------------------------------------------------------------------------------------------------------------------------------------------------------------------------------------------------------------------------------------------------------------------------------------------------------------------------|----------------------------------------------------------------------------------------------------------------------------------------------------------------------------------------------------------------------------------------------------------------------------------------------------------------------------------------------------------------------------------------------------------------------------------------------------|-----------------------------------|-------------------------------------------------------------------------------------------------------------------------------------------------------------------------------------------------------------------------------------------------------------------------------------------------|-----|
| <b>Kotzé et al. 2015(12)</b>      | Predictors of hemoglobin in Danish blood donors: results from the Danish Blood Donor Study                                  | Denmark                                  | Population-based study and biobank                                                                                                                      | 15197    | 18-67                | M/F | n/a                                                                                                 | n/a                                                                                                                                                                                                                                                      | SF <15 µg/l | Hb <12.0 g/dL for females and <13.0 g/dL for males                                                                                                                                                                                                                                                                                                                                                                                                                                                                                | Ferritin <15 ng/mL (333-/476/474)<br>Physical activity (-/-/1.33/1.77)<br>Use of iron supplements (-/-)<br>Vitamin supplements (-/-)<br>Older age (-/-/1.10)<br>OC use (-/-/1.10)<br>Liquor use (-/1.61/-/1.6)<br>Vitamin supplements only in coffee consumption (-/-/1.12/2)<br>BMI (-/0.96/0.88)<br>Menopause (0.66/-/1.26) in non-smoking women (0.71)<br>Tea consumption (-/-/0.88)<br>Total number of donations per 10 donations (0.81/-/1.1) |                                   |                                                                                                                                                                                                                                                                                                 |     |
| <b>Lee et al. 2014(13)</b>        | Prevalence and risk factors for iron deficiency anemia in the fifth Korean National Health and Nutrition Examination Survey | South Korea                              | Cross-sectional study utilizing information from health interview, health examination, and national survey                                              | 6758     | 10-n/a (>=75)        | M/F | 2.0 (M)<br>22.4 (F)<br>31.4 (F; reproductive age)                                                   | 0.7 (M)<br>8.0 (F)<br>11.5 (F; reproductive age)                                                                                                                                                                                                         | SF <15 µg/l | Hb <10.0 g/dL for males <15 years old and Hb <12.0 g/dL in non-pregnant females >15 years old                                                                                                                                                                                                                                                                                                                                                                                                                                     | Age <65 years (8.1)<br>Pre-menopausal status (42.8)<br>Low income*<br>BMI in underweight category*<br>Lactation (-/1.01/-/1.01)<br>*Pregnancy (86.5)                                                                                                                                                                                                                                                                                               | n/a                               | BMI in overweight and obese categories<br>Other dietary factors (protein or total energy intake)                                                                                                                                                                                                |     |
| <b>Levi et al. 2016(14)</b>       | Epidemiology of iron deficiency anaemia in four European countries: a population-based study in primary care                | Multiple: Italy, Belgium, Germany, Spain | Retrospective database study                                                                                                                            | 1894579  | 0-95                 | M/F | n/a                                                                                                 | 0.68-1.62 (M, Belgium-Germany)<br>2.23-4.48 (F, Belgium-Spain)                                                                                                                                                                                           | n/a         | CD-9-CM code 280* or ICD-10-CM code D50* and when NSAIDs in three countries (-/1.13/1.31/1.10)<br>Aspirin (1.21/1.37/1.11/1.43)<br>Antacids and other drugs used for ulcers/GERD (1.08/1.27/1.35/1.39)<br>Corticosteroids (-/1.48/1.23/-)<br>Menorrhagia (1.80/1.42/-/1.58)<br>Headache (1.10/1.19/1.21/1.31)<br>Alopecia (-/-/1.69)<br>Xerostomia (-/-/1.52)<br>Weaknesses (1.16/1.32/1.38/1.11)<br>Charlson Comorbidity Index >0<br>Obesity (-/1.62/2.82/1.53)<br>*Pregnancy (1.20/1.87/-/1.20)<br>*Several conditions/diseases | NSAIDs in one country (0.91/-/1.1)<br>Other medication (corticosteroids)<br>Several conditions/diseases<br>Several signs/symptoms                                                                                                                                                                                                                                                                                                                  |                                   |                                                                                                                                                                                                                                                                                                 |     |
| <b>Monzón et al. 2013(15)</b>     | Helicobacter pylori infection as a cause of iron deficiency anaemia of unknown origin                                       | Spain                                    | Prospective study where patients with chronic iron deficiency and H. pylori infection were evaluated for iron deficiency after eradication of H. pylori | 89       | 18-n/a (46.0 ± 11.8) | B   | n/a                                                                                                 | n/a                                                                                                                                                                                                                                                      | SF <13 µg/l | Hb < 10.5 g/dL and SF <13 µg/l (women) or Hb < 11.5 g/dL and SF <13 µg/l                                                                                                                                                                                                                                                                                                                                                                                                                                                          | H. pylori infection                                                                                                                                                                                                                                                                                                                                                                                                                                | n/a                               | n/a                                                                                                                                                                                                                                                                                             |     |
| <b>Morrone et al. 2012(16)</b>    | Iron deficiency anaemia prevalence in a population of immigrated women in Italy                                             | Italy                                    | Cross-sectional study utilizing iron biomarkers and a questionnaire of socio-demographic, clinical and nutritional information                          | 453      | 14-60                | F   | 22.7 (total),<br>36 (African origin),<br>23 (Latin American origin)<br>22 (Eastern European origin) | 11.5                                                                                                                                                                                                                                                     | SF <15 µg/l | Hb < 12 g/dL and SF <15 ng/mL                                                                                                                                                                                                                                                                                                                                                                                                                                                                                                     | African origin (3.8)<br>Menstruation (7.9)<br>Menorrhagia (5.3)<br>Metrorrhagia (6.4)<br>Hemorrhoids (3.8)<br>Skipping lunch (2.9)                                                                                                                                                                                                                                                                                                                 | n/a                               | Age<br>Other origin (Eastern Europe, Latin America, Asia)<br>Length of stay in Italy<br>Education<br>Occupation<br>Housing<br>Civil status<br>Children<br>Food consumption (number of meals, place of consumption)<br>Meal type (meat and fish, vegetable, fruit, legume, milk and derivatives) |     |
| <b>Mota et al. 2019(17)</b>       | Estimation of the Burden of Iron Deficiency Anemia in France from Iron Intake: Methodological Approach                      | France                                   | Probabilistic risk assessment model                                                                                                                     | 53859436 | 3-75                 | M/F | n/a                                                                                                 | 15 (M, 15-17y)<br>9 (M, 18-24y)<br>5 (M, 25-44y)<br>4 (M, 45-64y)<br>3.4 (M, 65-74y)<br>premenopausal:<br>43.7 (F, 15-17y)<br>37 (F, 18-24y)<br>32 (F, 25-44y)<br>27 (F, 45-64y)<br>postmenopausal:<br>34 (F, 25-44y)<br>8 (F, 45-64y)<br>10 (F, 65-74y) | SF <30 µg/l | Hb <13.0 g/dL (males) <12.0 g/dL (females)                                                                                                                                                                                                                                                                                                                                                                                                                                                                                        | Menstruation*<br>Female sex*<br>Age ≤ 24 years*                                                                                                                                                                                                                                                                                                                                                                                                    | Red meat consumption <sup>†</sup> | n/a                                                                                                                                                                                                                                                                                             |     |
| <b>Napolitano et al. 2014(18)</b> | Iron-dependent erythropoiesis in women with excessive menstrual blood losses and women with normal menses                   | Italy                                    | Prospective study assessing menstrual blood and iron loss along with iron biomarkers                                                                    | 105      | 20-45                | F   | n/a                                                                                                 | n/a                                                                                                                                                                                                                                                      | n/a         | n/a                                                                                                                                                                                                                                                                                                                                                                                                                                                                                                                               | n/a                                                                                                                                                                                                                                                                                                                                                                                                                                                | Menorrhagia*                      | n/a                                                                                                                                                                                                                                                                                             | n/a |
| <b>Rigas et al. 2018(19)</b>      | Calcium in drinking water: effect on iron stores in Danish blood donors—results from the Danish Blood Donor Study           | Denmark                                  | Cohort study and biobank                                                                                                                                | 10626    | n/a                  | M/F | n/a                                                                                                 | n/a                                                                                                                                                                                                                                                      | SF <15 µg/l | n/a                                                                                                                                                                                                                                                                                                                                                                                                                                                                                                                               | Higher calcium content in drinking water (1.55/1.20) <sup>†</sup>                                                                                                                                                                                                                                                                                                                                                                                  | n/a                               | Higher calcium content in drinking water in participants who received iron supplements                                                                                                                                                                                                          |     |
| <b>Sandström et al. 2014(20)</b>  | Helicobacter pylori Antibodies and Iron Deficiency in Female Adolescents                                                    | Sweden                                   | Controlled clinical trial                                                                                                                               | 149      | 15-19                | F   | 50 %                                                                                                | 3 %                                                                                                                                                                                                                                                      | SF <16 µg/l | Hb <120 g/L                                                                                                                                                                                                                                                                                                                                                                                                                                                                                                                       | H. pylori antibodies                                                                                                                                                                                                                                                                                                                                                                                                                               | n/a                               | n/a                                                                                                                                                                                                                                                                                             |     |

|                         |                                                                                                                                |             |                                                                                                |       |        |     |                                                                                             |                              |                                                                                                                                                                                                                                                                                          |                                                                             |                                                                                                                                                                                                                                                                   |                                                                                                                                                                                                                                              |                                                                                                                                                                    |
|-------------------------|--------------------------------------------------------------------------------------------------------------------------------|-------------|------------------------------------------------------------------------------------------------|-------|--------|-----|---------------------------------------------------------------------------------------------|------------------------------|------------------------------------------------------------------------------------------------------------------------------------------------------------------------------------------------------------------------------------------------------------------------------------------|-----------------------------------------------------------------------------|-------------------------------------------------------------------------------------------------------------------------------------------------------------------------------------------------------------------------------------------------------------------|----------------------------------------------------------------------------------------------------------------------------------------------------------------------------------------------------------------------------------------------|--------------------------------------------------------------------------------------------------------------------------------------------------------------------|
| Saydam et al. 2017(21)  | Prevalence of anemia and related factors among women in Turkey                                                                 | Turkey      | Descriptive study                                                                              | 418   | 15-89  | F   | 15.6                                                                                        | 10.3                         | n/a                                                                                                                                                                                                                                                                                      | Hb <12.0 g/dL and low blood iron levels                                     | Age 15-49 years (2.73)<br>Premenopausal status and menstruation (2.49)                                                                                                                                                                                            | n/a                                                                                                                                                                                                                                          | BMI<br>Income level<br>Education<br>Family<br>Use of contraception<br>History of pregnancy or Cesarean section<br>Miscarriage<br>Abortion and delivery             |
| Sekhar et al. 2015(22)  | Identifying factors predicting iron deficiency in United States adolescent females using the ferritin and the body iron models | USA         | Cross-sectional study utilizing questionnaire and iron biomarkers                              | 1765  | 12-21  | F   | 13.1 (ferritin model) <sup>a</sup><br>9.1 (body iron model) <sup>a</sup>                    | 2.7*                         | Ferritin model in ≥16-21-year-olds : at least two of three abnormal values for TS (<15 %), SF (<16.5 µg/l) and erythrocyte protoporphyrin (>70 µg/dL)<br><br>Body iron model: body iron was measured using a formula developed by Cook et al., a negative value (<0 mg/kg) indicating ID | Hb <12.0 g/dL (age ≥ 15 years)                                              | Ferritin model: Age ≥16 years (1.69)<br>Non-white ethnicity (1.98)<br>Increased physical activity level (2.30)<br>Body iron model: Age over 16 years (3.54)<br>Food insecurity (2.55)                                                                             | Ferritin model: medroxy-progesterone acetate injection (0.36)                                                                                                                                                                                | BMI<br>Years since menarche<br>Treatment for anemia in the past three months<br>Past pregnancy<br>Food and drink intake (coffee, chicken, turkey)<br>Family income |
| Sekhar et al. 2016(23)  | Differences in Risk Factors for Anemia Between Adolescent and Adult Women                                                      | USA         | Cross-sectional study utilizing questionnaire and iron biomarkers                              | 6602  | 12-49  | F   | n/a                                                                                         | 2.4 (12-21y)<br>5.5 (22-49y) | Ferritin and body iron models                                                                                                                                                                                                                                                            | Hb <12.0 g/dL (age ≥ 15 years)                                              | In ages 22-49-years-old: Ethnicity (self-identified Black) (2.06)<br>Poverty-to-income ratio (1.98)<br>Consuming the RDA of iron (1.52)<br>Over two live births (2.27)<br><br>In ages 12-21-years-old none of the variables were significant risk factors for IDA | In ages 22-49-years-old: BMI in the overweight category (0.47)<br>BMI in the obese category (0.75)<br>Less than full food security (0.52)<br>Exposure to tobacco/nicotine (0.49)<br><br>In ages 12-21-years-old: Use of contraceptives (0.5) | Other ethnicity (self-identified Mexican/Hispanic, White and Other)<br>Physical activity<br>Menstruation                                                           |
| Shin et al. 2013(24)    | Low vitamin D levels increase anemia risk in Korean women                                                                      | South Korea | Cross-sectional study utilizing iron biomarkers and a health- and nutrition examination survey | 5786  | 20-n/a | M/F | n/a                                                                                         | 5.8 (F)<br>1.2 (M)           | n/a                                                                                                                                                                                                                                                                                      | Hb < 13 g/dl (males) or < 12 g/dl (females) and SF < 12 ng/ml and TS < 15%. | Low 25-hydroxyvitamin D in pre- and postmenopausal females (1.53/3.43) <sup>a</sup>                                                                                                                                                                               | n/a                                                                                                                                                                                                                                          | Low 25-hydroxyvitamin D in males                                                                                                                                   |
| Spencer et al. 2019(25) | Elevated risk for iron depletion in high-school age blood donors                                                               | USA         | Longitudinal cohort study utilizing donation database                                          | 4265  | 16-49  | M/F | 1 (M)<br>18 (F) (*before first blood donation)                                              | n/a                          | SF <12 µg/l                                                                                                                                                                                                                                                                              | n/a                                                                         | Younger age (16, 17 and 18-years-old) (2.6, 2.8 and 2.1)<br>Female sex (14.9)<br>*Shorter blood donation interval<br>*Higher amount of total donations in a 24 month period                                                                                       | n/a                                                                                                                                                                                                                                          | n/a                                                                                                                                                                |
| Spencer et al. 2019(26) | Iron status and risk factors for iron depletion in a racially/ethnically diverse blood donor population                        | USA         | Cross-sectional study utilizing questionnaires on ID risk factors and iron biomarkers          | 12683 | 18-n/a | M/F | 20-30 (F, African American – Hispanic)<br>4.4-16 (M, African American – non-Hispanic white) | n/a                          | SF <12 µg/l                                                                                                                                                                                                                                                                              | n/a                                                                         | Female sex (3.46)<br>Regular antacid use (1.24)<br>Hispanic ethnicity (1.25)<br>Use of exogenous testosterone (2.29)<br>* Higher blood donor activity                                                                                                             | Daily iron supplementation (0.59)<br>Age over 50 years in females (0.56)<br>African American ethnicity (0.81)<br>Asian ethnicity (0.76)<br>Smoking (0.66)                                                                                    | Non-Hispanic Caucasian ethnicity<br>Use of OC                                                                                                                      |
| Wu et al. 2016(27)      | Hematinic deficiencies and anemia statuses in recurrent aphthous stomatitis patients with or without atrophic glossitis        | Taiwan      | Case-control study                                                                             | 160   | 18-90  | M/F | n/a                                                                                         | 33.3                         | Hb < 13 g/dL (males) or < 12 g/dL (females) and MCV <80 fl and serum iron <60 µg/dL                                                                                                                                                                                                      | Serum iron <60 µg/dL                                                        | Recurrent aphthous stomatitis*                                                                                                                                                                                                                                    | n/a                                                                                                                                                                                                                                          | n/a                                                                                                                                                                |

y=years

M=males

F=females

SF=serum ferritin

TS=transferrin saturation

OC=oral contraceptive

IUD=intrauterine device

OR = odds ratio

RR = risk ratio

HR = hazard ratio

\* = factor influenced ID risk, but our search strategy excluded it

<sup>a</sup> = Higher prevalence in group



<sup>b</sup> = As Hb was significantly higher in smokers compared to non-smokers, the authors stratified for current smoking. OR reported for non-smoking women/smoking female/non-smoking men/smoking men, - = insignificant or not studied)

<sup>c</sup> = Italy/Belgium/Germany/Spain

<sup>d</sup> = Consumption scenario built on ground beef intake

<sup>e</sup> = Median and mean Hb and SF levels in women with menorrhagia compared to women with normal menstrual bleeding

<sup>f</sup> = Males/females

<sup>g</sup> = Prevalence for age 12-21

<sup>h</sup> = Premenopausal/postmenopausal

## Sex

Overall, the prevalence of ID and IDA were significantly higher in females compared to males (3)(11)(13)(14)(17)(25)(26). One study concluded that there are, however, differences in the risk factors even among reproductive aged women by successfully identifying several significant risk factors in the older population (22-49 years) but not finding any variables for predicting IDA in the younger study population (12-21 years) (23).

## Menstruation

ID and IDA were found to be associated with menstrual blood loss, both when menstrual blood loss was self-reported and by measured blood loss(7)(8)(14)(16)(18)(21). Menstruation in women aged 25-44 years was the greatest contributor to the disease burden of IDA (DALY, disease adjusted life year) (17). The amount of years menstruating was also associated with IDA(23).

Heavy or prolonged menstrual bleeding (menorrhagia) was reported as a significant risk factor for ID and IDA in several studies (4)(7)(16) with evidence suggesting the IDA is caused by the heavy menstrual bleeding itself, not an underlying bleeding disorder (4). Evidence also showed a correlation between menstrual blood loss and menstrual iron loss, as well as a significantly higher iron loss in women with menorrhagia compared to normal menstruation. The study also found that most women with menorrhagia had depleted iron stores(18). Intermenstrual bleeding (metrorrhagia) also caused an increased risk of IDA (16). IDA risk was unsurprisingly also higher when both conditions were combined, as in menometrorrhagia (14).

As expected menopause and non-physiological amenorrhea decreased the risk for both ID and IDA(12)(13)(17).

## Age

In males ID prevalence remained similar across age groups showing a slight U-formed relationship, while IDA rates increased slightly with age (3)(13). One of the studies found ID prevalence to be the highest in the younger age group and decreasing with age(17). For females prevalence of both ID and IDA was significantly higher in reproductive age compared to older age groups (3)(13)(16)(17)(21)(22).

When prevalence was reported for both sexes combined, IDA prevalence was higher in young and middle-aged participants, decreasing in the oldest age group(14)(26). In a study on young blood donors age 16-18 years was found to be an independent determinant for ID in both males and females (25).

## **BMI**

BMI in the overweight and obese category had a protective effect on IDA in females(10)(23), although the effect was reduced with consumption of high dietary fat and low carbohydrate (10). Likewise, higher BMI decreased the risk of lower Hb levels(12). Low BMI was associated with higher IDA risk compared to those with BMI in the normal-weight or obese categories (13).

There was, however, some discrepancy in the results. Iron absorption and the absorption-enhancing effect of ascorbic acid were lower in overweight and obese women compared to normal-weight women (9). Obesity was also associated with IDA in one study (14), yet no statistically significant association between BMI and ID/IDA was found in two of the studies(9)(21).

## **Dietary factors**

Consumption of red meat was widely cited as a protective factor against ID(6)(7)(8). Interestingly, one study showed that total iron consumption was similar among groups with normal iron status, mild ID and ID, while the only significant difference in food intake was red meat consumption, suggesting heme iron is an important determinant for iron status(8). It was estimated that red meat consumption of 100 g/day would decrease although not eliminate the disease burden of IDA, as well as decrease prevalence of ID in French females(17). Although ID prevalence was high in women following a vegetarian diet, there was not a significant difference between the different types of vegetarian diet or time as a vegetarian. Prevalence of IDA in both sexes and ID in males were low (11).

In premenopausal women, following a “meat and vegetable” dietary pattern decreased the risk while following a “milk and yoghurt” dietary pattern increased the risk of ID(6)(7). In another study, “meat and vegetables” only decreased the odds in women who had children(7). The women were also more likely to have sufficient iron status if milk products were consumed between meals(6).

Once again, the evidence was somewhat inconsistent. Nondietary factors were stronger indicators of ID than dietary factors in premenopausal women(7). Two studies did not find any association between any dietary factors (including meat and milk) and IDA(12)(16), although skipping lunch did increase the risk(16). No association was detected between total energy or protein intake and IDA, although there was an association with lower than the recommend nutritional intake of iron and vitamin C (13). Vitamin D deficiency increased the risk of IDA in females but not in males (24).

## **Medical conditions and symptoms**

ID and IDA was associated with helicobacter pylori infection(15)(20). IDA prevalence was high in patients with restless legs syndrome (RLS), as IDA is a main risk factor for RLS (5). Symptoms associated with IDA were weakness, headache, xerostomia, alopecia and irritability. The same study also identified Charlson comorbidity index >0 as a risk factor (14). Additionally, IDA risk was increased with hemorrhoids (16) and aphthous stomatitis, especially when associated with atrophic glossitis (27).

## **Use of exogenous hormones, medications and supplements**

Although OC use was higher in females who had sufficient iron status than those who did not (7)(8), it was suggested that when OC use was considered alongside other determinants for ID or when menstrual bleeding was controlled for that there was no additional effect of OC use on ID risk(7). On the other hand, in one study OC use was associated with lower Hb levels (12), although



this study did not consider menstruation as a variable. Another two studies found use of contraceptives to be protective against IDA (23) and ID (26). In addition, medroxyprogesterone acetate injection showed a protective effect against ID (22). As for exogenous hormone use in males, testosterone was associated with increased risk of ID (26).

Use of aspirin increased the risk of IDA risk, as did use of NSAIDs. However, the increased risk for NSAIDs only applied to three of four countries studied, whereas the risk decreased in one of the countries(26). Additionally, there was evidence for increased risk for both ID and IDA with use of antacids and/or PPIs (14)(26).

Iron supplement use was higher in groups with ID or IDA (11)(12), as well as associated with IDA in one study (23). Another study found daily iron supplementation to be protective against ID, but not if supplementation was less than daily (26).

## **Socioeconomic factors**

IDA was associated with low income (13) and low family poverty-to-income ratio (23). However, other studies did not find a significant association with SES (income(3)(21), education(3) or employment status (16)). Food insecurity in terms of worrying about running out of food increased the risk of ID in one study (22), although the effect was the opposite for IDA with less than full food security being protective against it in a subsequent study from the same team (23).

The IDA risk was higher in women with more than two live births as opposed to two or under (23).

## **Ethnicity**

Ethnicity was widely cited as a determinant for ID/IDA risk, although the results were indecisive.

“Asian” ethnicity was cited as a risk factor for ID when compared to “European” and “other” ethnicities(6)(7). “Non-white” was cited as a risk factor for ID(22) and “Black” for IDA(23). On the other hand, “African American” and “Asian” blood donors had lower risk for ID than “non-Hispanic Caucasian” donors, while “Hispanic” donors were of higher risk.

IDA prevalence was high in a study of immigrated women in Italy, in which women of African descent were the most likely to suffer from IDA (16).

## **Environmental and lifestyle factors**

Although ID was associated with exercise only in one study that also included children aged 12-14 years(22), iron-sufficient participants were more likely to exhibit higher amounts of exercise while participants with IDA were more likely to be sedentary(11). Contrarily, in other studies higher physical activity was more common in the group with lower Hb levels(12) or the effect of exercise didn't reach statistical significance(23).

Smoking and exposure to tobacco or nicotine reduced the risk of ID(23)(26), and smokers had significantly higher mean Hb than non-smokers(12).

Although the effect size was minor, one of the studies found that the higher the calcium content in drinking water is, the higher the ID risk is (19).

## **Discussion**

We found evidence that strengthened previously reported results on reasons behind low hemoglobin deferrals in blood donors, like female sex, increasing age, low body weight and Hispanic or African ethnicities. Furthermore, we identified several other determinants for ID and IDA that potentially could be used for more individualized selection of blood donors. These included heavy menstrual bleeding and some medications and medical conditions, low SES as well as genetic variants and ethnicity. In this section, we will discuss these other determinants further.

## Menstruation

Menstruation has long been considered a risk factor for ID/IDA and it is evident from the studies in this review that heavy menstruation causes even higher rates of ID and IDA. It would be useful to further study the population of female donors to see if it is possible to tailor a more individualized approach for donor selection to minimize the risk in women who experience heavy menstrual bleeding.

Dietary factors are notoriously hard to study, which was highlighted in this review. Several possible risk factors for and protective factors against ID and IDA were identified in the studies included in this review, although none other than red meat and milk consumption stood out in terms of congruence in the multiple articles. While red meat consumption had a protective effect against ID and IDA, milk consumption increased the risk. Similarly, we have questioned participants on their dietary habits as part of a 28-question questionnaire in a prospective longitudinal cohort study on Finnish blood donors and found that the strongest association with higher ferritin levels was red meat consumption.

The effect of BMI and ethnicity were inconclusive due to contradictory results. Weight is commonly included in the donor selection process in order to offset low blood volume, but as far as we know BMI categories are not accounted for in donor selection processes. We have had some earlier evidence suggesting donors with higher BMI have higher ferritin levels in the FinDonor 10 000 study (29), but this review suggest there might be confounding factors not yet considered. Further study is also required to see the extent ethnicity causes variation in the blood donor population, preferably in combination with genetic studies. Blood donors from all ethnic backgrounds are needed due to rare blood groups, and it is vital that the donor population is varied.

Several medications were associated with lowered iron parameters, significantly PPIs and antacids. Gastric acid facilitates absorption of iron and ID has been linked to PPI use in the past (30). Therefore, asking donors about use of either of these types of medications could be warranted, although further inquiry into the magnitude of the dose-effect relationship is and how fast iron storage recovers after the medication is discontinued is needed. As far as having a protective effect use of hormonal contraception did show an association for women with heavy menstrual bleeding and could possibly also be used as a guiding factor in the selection process, possibly in relation to heavy menstruation discussed earlier. NSAIDs and aspirin use were also identified as risk factors, with aspirin showing the same risk in all four countries studies while results for NSAIDs were more inconclusive. One explanation for this result could be the secondary preventative use of low-dose aspirin and possible concurrent use of PPIs and NSAIDs.

Although lower SES was a risk factor for ID and IDA, comparison between different countries is difficult due to different social and economic settings and using SES as a factor for donor selection is impractical. Vitamin D deficiency and water hardness do not seem to be a significant enough cause to warrant change in the blood donor selection process. RLS shows some potential as a marker for IDA, although further research is needed to assess if symptoms resolve or persist after successful IDA treatment.

## Study strengths and limitations

There are several methodological limitations to this study.

Firstly, the studies used were not limited to just one measure for ID or IDA. The iron status was assessed by ferritin and Hb concentrations and ICD codes. Some studies used CRP to confirm non-inflammatory status, but this was not the case in all studies. Therefore, it is difficult to determine how the results relate to one another. Secondly, the studies used different definitions for ID. Thirdly, the study designs in the records used differed from each other. This is not necessarily a bad thing as it gives us a larger perspective of the studies done on this subject. Nonetheless, it makes comparison inconvenient.

One major methodological flaw of this study is that *H. Pylori* infection was excluded from the Scopus search in the early stages in order to get a more manageable search result. This likely excluded some potential articles on these subjects. However, these terms were not excluded from the PubMed and Ovid Medline searches.

Possible overlapping of risk factors is a challenge that this study was not able to answer. These confounding factors have not been accounted for in this review and further investigation is needed to determine the actual prevalence of ID and IDA when controlling for these factors. The results can also be skewed due to the so-called healthy donor effect (31).

The strengths of this study are the broad use of search terms as well as the use of three different databases.

In conclusion, current evidence suggests that several determinants, including biological, environmental, lifestyle and socioeconomic factors increase the risk for ID. Although several of these factors are commonly accounted for in blood donor selection, we identified some determinants that show potential for inclusion in the selection process. These include heavy menstrual bleeding and use of some medications. Further study is needed to ascertain whether inclusion would influence donor health and the blood supply as well as how best to implement the changes if they are deemed necessary.

## References

1. United Nations Development programme Human Development Reports: Latest Human Development Index Ranking [Internet]. Available from: <http://hdr.undp.org/en/content/latest-human-development-index-ranking>
2. Assessing the iron status of populations [Internet]. Available from: [https://apps.who.int/iris/bitstream/handle/10665/75368/9789241596107\\_eng.pdf;jsessionid=054253079AD942DB2B4DD52FABF364C9?sequence=1](https://apps.who.int/iris/bitstream/handle/10665/75368/9789241596107_eng.pdf;jsessionid=054253079AD942DB2B4DD52FABF364C9?sequence=1)
3. Al Zenki S, Alomirah H, Al Hooti S, Al Hamad N, Jackson RT, Rao A, et al. Prevalence and Determinants of Anemia and Iron Deficiency in Kuwait. *Int J Environ Res Public Health*. 2015 Jul;12(8):9036–45.
4. Alaqzam TS, Stanley AC, Simpson PM, Flood VH, Menon S. Treatment Modalities in Adolescents Who Present with Heavy Menstrual Bleeding. *J Pediatr Adolesc Gynecol*. 2018 Oct;31(5):451–8.
5. Alsafadi S, Abaalkhail B, Wali SO, Aljammali K, Alotaiby B, Zakaria I, et al. Risk factors of primary and secondary restless legs syndrome among a middle-aged population in Saudi Arabia: A community-based study. *Ann Thorac Med*. 2018;13(3):175–81.
6. Beck KL, Kruger R, Conlon CA, Heath A-LM, Matthys C, Coad J, et al. Suboptimal iron

- status and associated dietary patterns and practices in premenopausal women living in Auckland, New Zealand. *Eur J Nutr*. 2013 Mar;52(2):467–76.
7. Beck KL, Conlon CA, Kruger R, Heath A-LM, Matthys C, Coad J, et al. Blood donation, being Asian, and a history of iron deficiency are stronger predictors of iron deficiency than dietary patterns in premenopausal women. *Biomed Res Int*. 2014;2014:652860.
  8. Blanco-Rojo R, Toxqui L, López-Parra AM, Baeza-Richer C, Pérez-Granados AM, Arroyo-Pardo E, et al. Influence of diet, menstruation and genetic factors on iron status: a cross-sectional study in Spanish women of childbearing age. *Int J Mol Sci*. 2014 Mar;15(3):4077–87.
  9. Cepeda-Lopez AC, Melse-Boonstra A, Zimmermann MB, Herter-Aeberli I. In overweight and obese women, dietary iron absorption is reduced and the enhancement of iron absorption by ascorbic acid is one-half that in normal-weight women. *Am J Clin Nutr*. 2015 Dec;102(6):1389–97.
  10. Chang J-S, Chen Y-C, Owaga E, Palupi KC, Pan W-H, Bai C-H. Interactive effects of dietary fat/carbohydrate ratio and body mass index on iron deficiency anemia among Taiwanese women. *Nutrients*. 2014 Sep;6(9):3929–41.
  11. Gallego-Narbón A, Zapatera B, Vaquero MP. Physiological and Dietary Determinants of Iron Status in Spanish Vegetarians. *Nutrients*. 2019 Jul;11(8).
  12. Kotzé SR, Pedersen OB, Petersen MS, Sørensen E, Thørrner LW, Sørensen CJ, et al. Predictors of hemoglobin in Danish blood donors: results from the Danish Blood Donor Study. *Transfusion*. 2015 Jun;55(6):1303–11.
  13. Lee J-O, Lee JH, Ahn S, Kim JW, Chang H, Kim YJ, et al. Prevalence and risk factors for iron deficiency anemia in the Korean population: results of the fifth Korea National Health and Nutrition Examination Survey. *J Korean Med Sci*. 2014 Feb;29(2):224–9.
  14. Levi M, Rosselli M, Simonetti M, Brignoli O, Cancian M, Masotti A, et al. Epidemiology of iron deficiency anaemia in four European countries: a population-based study in primary care. *Eur J Haematol*. 2016 Dec;97(6):583–93.
  15. Monzón H, Forné M, Esteve M, Rosinach M, Loras C, Espinós JC, et al. Helicobacter pylori infection as a cause of iron deficiency anaemia of unknown origin. *World J Gastroenterol*. 2013 Jul;19(26):4166–71.
  16. Morrone A, Nosotti L, Piombo L, Scardella P, Spada R, Pitidis A. Iron deficiency anaemia prevalence in a population of immigrated women in Italy. *Eur J Public Health*. 2012 Apr;22(2):256–62.
  17. Mota JDO, Tounian P, Guillou S, Pierre F, Membré J-M. Estimation of the Burden of Iron Deficiency Anemia in France from Iron Intake: Methodological Approach. *Nutrients*. 2019 Sep;11(9).
  18. Napolitano M, Dolce A, Celenza G, Grandone E, Perilli MG, Siragusa S, et al. Iron-dependent erythropoiesis in women with excessive menstrual blood losses and women with normal menses. *Ann Hematol*. 2014 Apr;93(4):557–63.
  19. Rigas AS, Ejsing BH, Sørensen E, Pedersen OB, Hjalgrim H, Erikstrup C, et al. Calcium in drinking water: effect on iron stores in Danish blood donors—results from the Danish Blood Donor Study. *Transfusion*. 2018 Jun;58(6):1468–73.
  20. Sandström G, Rödger S, Kaijser B, Börjesson M. Helicobacter pylori antibodies and iron deficiency in female adolescents. *PLoS One*. 2014;9(11):e113059.
  21. Saydam BK, Genc RE, Sarac F, Turfan EC. Prevalence of anemia and related factors among women in Turkey. *Pakistan J Med Sci*. 2017;33(2):433–8.
  22. Sekhar DL, Murray-Kolb LE, Kunselman AR, Paul IM. Identifying factors predicting iron deficiency in United States adolescent females using the ferritin and the body iron models. *Clin Nutr ESPEN*. 2015 Jun;10(3):e118–23.
  23. Sekhar DL, Murray-Kolb LE, Kunselman AR, Weisman CS, Paul IM. Differences in Risk Factors for Anemia Between Adolescent and Adult Women. *J Womens Health (Larchmt)*. 2016 May;25(5):505–13.

24. Shin JY, Shim JY. Low vitamin D levels increase anemia risk in Korean women. *Clin Chim Acta*. 2013 Jun;421:177–80.
25. Spencer BR, Bialkowski W, Creel D V, Cable RG, Kiss JE, Stone M, et al. Elevated risk for iron depletion in high-school age blood donors. *Transfusion*. 2019 May;59(5):1706–16.
26. Spencer BR, Guo Y, Cable RG, Kiss JE, Busch MP, Page GP, et al. Iron status and risk factors for iron depletion in a racially/ethnically diverse blood donor population. *Transfusion*. 2019 Oct;59(10):3146–56.
27. Wu Y-C, Wu Y-H, Wang Y-P, Chang JY-F, Chen H-M, Sun A. Hematinic deficiencies and anemia statuses in recurrent aphthous stomatitis patients with or without atrophic glossitis. *J Formos Med Assoc*. 2016 Dec;115(12):1061–8.
28. Smith GA, Fisher SA, Dorée C, Roberts DJ. A systematic review of factors associated with the deferral of donors failing to meet low haemoglobin thresholds. *Transfus Med*. 2013 Oct;23(5):309–20.
29. Lobier M, Castrén J, Niittymäki P, Palokangas E, Partanen J, Arvas M. The effect of donation activity dwarfs the effect of lifestyle, diet and targeted iron supplementation on blood donor iron stores. *PLoS One*. 2019;14(8):e0220862.
30. Schubert ML. Physiologic, pathophysiologic, and pharmacologic regulation of gastric acid secretion. *Curr Opin Gastroenterol*. 2017 Nov;33(6):430–8.
31. van den Hurk K, Zalpuri S, Prinsze FJ, Merz E-M, de Kort WLAM. Associations of health status with subsequent blood donor behavior-An alternative perspective on the Healthy Donor Effect from Donor InSight. *PLoS One*. 2017;12(10):e0186662.
